# Supplementary material for: Principal component analysis of blood microRNA datasets facilitates diagnosis of diverse diseases
Source: PubMed Central journal article supplement (PMC7274418; doi:10.1371/journal.pone.0234185), 2020-06-05
Supplement: pone.0234185.s001.pdf [file pone.0234185.s001.pdf]

**S1 Table. Summary of principal component analysis (PCA) work- low in Qlucore Omics Explorer.**

---

- 1 Search NCBI GEO Datasets for a specific disease; obtain the GEO accession number.
  - 2 Open QOE
  - 3 (click) File
  - 4 (click) Download
  - 5 (click) GEO Dataset
  - 6 Enter GSE number
  - 7 [OK]
  - 8 Download annotations if they exist → [OK]
  - 9 Data loads and is displayed as a PCA plot
  - 10 (click) Data tab
  - 11 Log 2 transform
  - 12 (click) Statistics box
  - 13 (click) Perform variance filtering
  - 14 Perform statistics filtering (e.g., two-group comparison or multigroup comparison)
  - 15 Adjust p value and q value to desired significance
  - 16 Visualize PCA plot and heatmap
  - 17 Export data and images
- 

Note: Steps 15 and 16 are interactive and simultaneous. PCA and heatmaps change according to p-value adjustments.
