# Supplementary material for: Principal component analysis of blood microRNA datasets facilitates diagnosis of diverse diseases
Source: PubMed Central journal article supplement (PMC7274418; doi:10.1371/journal.pone.0234185), 2020-06-05
Supplement: pone.0234185.s002.pdf [file pone.0234185.s002.pdf]

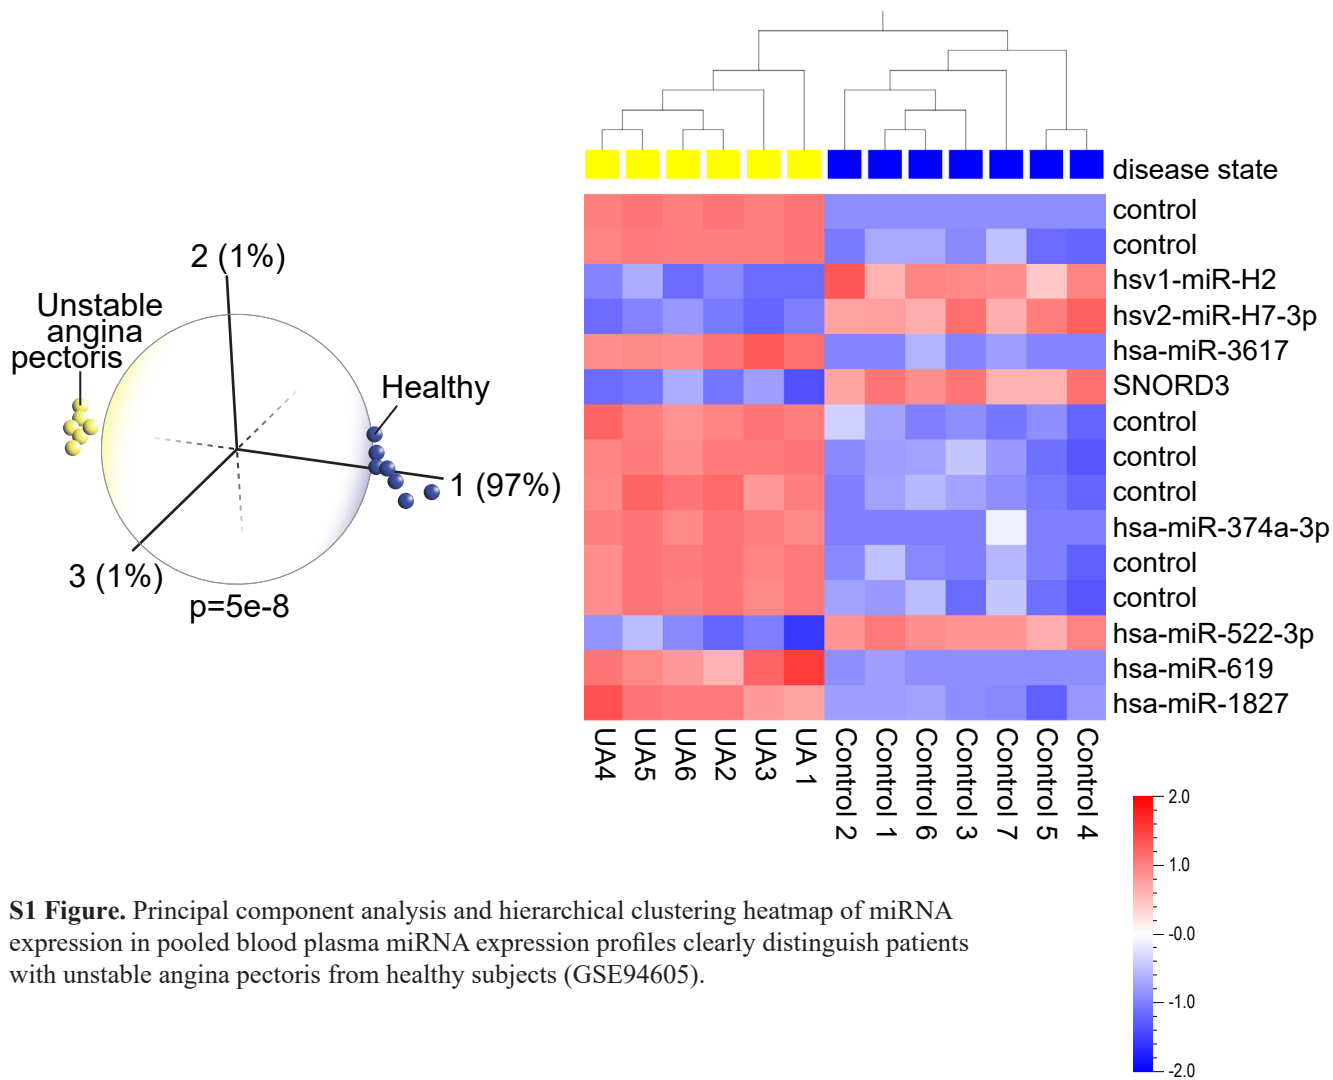

**S1 Figure.** Principal component analysis and hierarchical clustering heatmap of miRNA expression in pooled blood plasma miRNA expression profiles clearly distinguish patients with unstable angina pectoris from healthy subjects (GSE94605).
