# Supplementary material for: Principal component analysis of blood microRNA datasets facilitates diagnosis of diverse diseases
Source: PubMed Central journal article supplement (PMC7274418; doi:10.1371/journal.pone.0234185), 2020-06-05

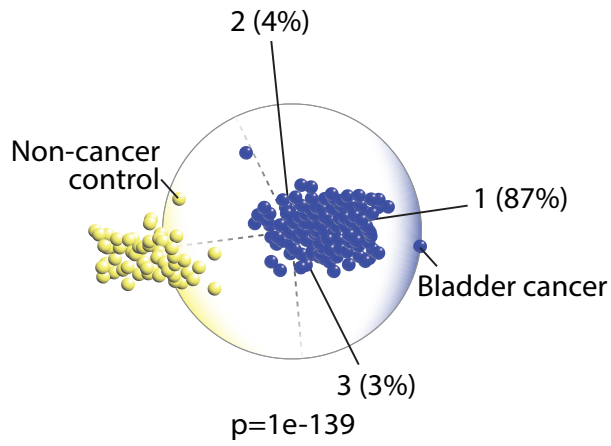

**S3 Figure.** Principal component analysis of serum miRNA expression clearly distinguishes 392 bladder cancer patients from 100 non-cancer controls (GSE113486).

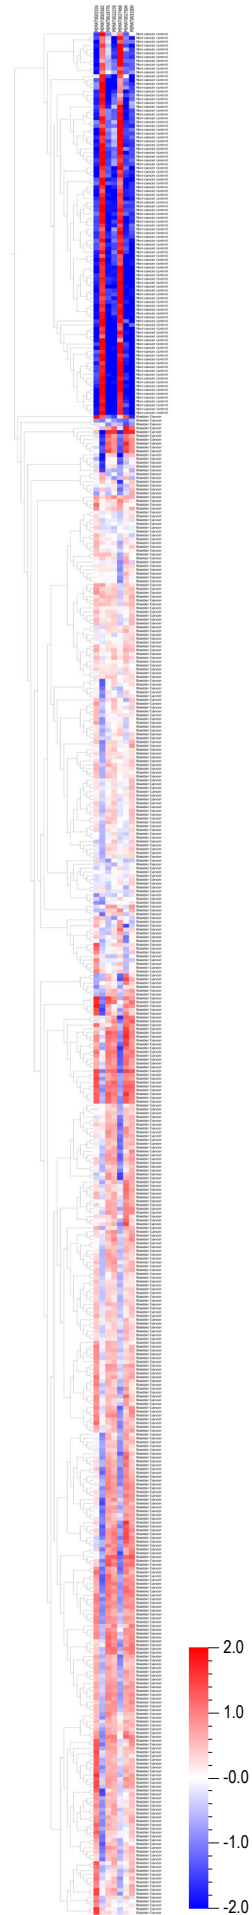

Supplement: pone.0234185.s004.pdf [file pone.0234185.s004.pdf]
